# Supplementary material
Source: publisher figshare collection journal article supplement (https://karger.figshare.com/articles/dataset/_/13153316)
Supplement: Supplementary file 1 [file 1]

Table S1. Subgroup analysis for MI

| Variable        | Group                          | Number<br>of trials | RR and 95% CI    | P value | I-square (%) | P value for<br>heterogeneity | P value for<br>meta-regression |
|-----------------|--------------------------------|---------------------|------------------|---------|--------------|------------------------------|--------------------------------|
| Sample size     | ≥ 1000                         | 4                   | 0.66 (0.51-0.84) | 0.001   | 0.0          | 0.832                        | 0.631                          |
|                 | <1000                          | 2                   | 0.77 (0.38-1.57) | 0.466   | 30.5         | 0.230                        |                                |
| Disease status  | Simple hypertension            | 3                   | 0.64 (0.50-0.83) | 0.001   | 0.0          | 0.719                        | 0.505                          |
|                 | Concomitant with other disease | 3                   | 0.77 (0.48-1.23) | 0.271   | 0.0          | 0.487                        |                                |
| Mean age (year) | ≥ 65.0                         | 1                   | 0.68 (0.39-1.17) | 0.165   | -            | -                            | 0.974                          |
|                 | <65.0                          | 5                   | 0.67 (0.52-0.86) | 0.002   | 0.0          | 0.637                        |                                |

|                             |          |   |                  |       |     |       |       |
|-----------------------------|----------|---|------------------|-------|-----|-------|-------|
| Intensity of statin therapy | Low      | 2 | 0.62 (0.46-0.84) | 0.002 | 0.0 | 0.538 | 0.466 |
|                             | Moderate | 4 | 0.74 (0.52-1.05) | 0.094 | 0.0 | 0.652 |       |
| Follow-up duration (years)  | ≥ 5.0    | 3 | 0.64 (0.49-0.83) | 0.001 | 0.0 | 0.802 | 0.422 |
|                             | <5.0     | 3 | 0.79 (0.50-1.24) | 0.306 | 0.0 | 0.483 |       |

---

Table S2. Subgroup analysis for stroke

| Variable            | Group                          | Number<br>of trials | RR and 95% CI    | P value | I-square (%) | P value for<br>heterogeneity | P value for<br>meta-regression |
|---------------------|--------------------------------|---------------------|------------------|---------|--------------|------------------------------|--------------------------------|
| Sample size         | ≥ 1000                         | 4                   | 0.82 (0.71-0.94) | 0.004   | 0.0          | 0.410                        | 0.662                          |
|                     | <1000                          | 2                   | 1.00 (0.33-2.97) | 0.994   | 37.8         | 0.205                        |                                |
| Disease status      | Simple hypertension            | 2                   | 0.72 (0.57-0.91) | 0.007   | 0.0          | 0.888                        | 0.185                          |
|                     | Concomitant with other disease | 4                   | 0.88 (0.74-1.04) | 0.132   | 0.0          | 0.406                        |                                |
| Mean age (year)     | ≥ 65.0                         | 2                   | 0.87 (0.73-1.04) | 0.135   | 2.5          | 0.311                        | 0.225                          |
|                     | <65.0                          | 4                   | 0.73 (0.59-0.92) | 0.008   | 0.0          | 0.534                        |                                |
| Intensity of statin | Low                            | 1                   | 0.68 (0.42-1.10) | 0.115   | -            | -                            | 0.416                          |

|                    |            |   |                  |       |     |       |       |
|--------------------|------------|---|------------------|-------|-----|-------|-------|
| therapy            | Moderate   | 5 | 0.84 (0.72-0.96) | 0.014 | 0.5 | 0.403 |       |
| Follow-up duration | $\geq 5.0$ | 3 | 0.85 (0.73-1.00) | 0.050 | 0.0 | 0.372 | 0.421 |
| (years)            | $<5.0$     | 3 | 0.76 (0.57-1.01) | 0.061 | 2.7 | 0.358 |       |

---

Table S3. Subgroup analysis for cardiac death

| Variable            | Group                          | Number<br>of trials | RR and 95% CI    | P value | I-square (%) | P value for<br>heterogeneity | P value for<br>meta-regression |
|---------------------|--------------------------------|---------------------|------------------|---------|--------------|------------------------------|--------------------------------|
| Sample size         | ≥ 1000                         | 4                   | 0.95 (0.84-1.07) | 0.407   | 0.0          | 0.681                        | 0.436                          |
|                     | <1000                          | 2                   | 1.37 (0.55-3.40) | 0.501   | 0.0          | 0.547                        |                                |
| Disease status      | Simple hypertension            | 3                   | 0.89 (0.72-1.09) | 0.252   | 0.0          | 0.655                        | 0.376                          |
|                     | Concomitant with other disease | 3                   | 1.00 (0.85-1.16) | 0.953   | 0.0          | 0.656                        |                                |
| Mean age (year)     | ≥ 65.0                         | 2                   | 0.98 (0.85-1.12) | 0.732   | 0.0          | 0.770                        | 0.512                          |
|                     | <65.0                          | 4                   | 0.88 (0.68-1.15) | 0.357   | 0.0          | 0.581                        |                                |
| Intensity of statin | Low                            | 1                   | 0.68 (0.37-1.26) | 0.217   | -            | -                            | 0.267                          |

|                    |          |   |                  |       |     |       |       |
|--------------------|----------|---|------------------|-------|-----|-------|-------|
| therapy            | Moderate | 5 | 0.97 (0.85-1.10) | 0.623 | 0.0 | 0.871 |       |
| Follow-up duration | ≥ 5.0    | 3 | 0.96 (0.84-1.10) | 0.544 | 0.0 | 0.508 | 0.894 |
| (years)            | <5.0     | 3 | 0.94 (0.70-1.26) | 0.668 | 0.0 | 0.577 |       |

---

Table S4. Subgroup analysis for all-cause mortality

| Variable            | Group                          | Number<br>of trials | RR and 95% CI    | P value | I-square (%) | P value for<br>heterogeneity | P value for<br>meta-regression |
|---------------------|--------------------------------|---------------------|------------------|---------|--------------|------------------------------|--------------------------------|
| Sample size         | ≥ 1000                         | 4                   | 0.95 (0.87-1.03) | 0.188   | 0.0          | 0.544                        | 0.075                          |
|                     | <1000                          | 2                   | 1.89 (0.89-4.04) | 0.099   | 0.0          | 0.643                        |                                |
| Disease status      | Simple hypertension            | 2                   | 0.89 (0.77-1.02) | 0.095   | 0.0          | 0.743                        | 0.214                          |
|                     | Concomitant with other disease | 4                   | 1.01 (0.78-1.31) | 0.929   | 22.5         | 0.276                        |                                |
| Mean age (year)     | ≥ 65.0                         | 2                   | 0.97 (0.89-1.06) | 0.535   | 0.0          | 0.485                        | 0.410                          |
|                     | <65.0                          | 4                   | 0.96 (0.69-1.33) | 0.788   | 31.2         | 0.225                        |                                |
| Intensity of statin | Low                            | 1                   | 0.77 (0.46-1.31) | 0.338   | -            | -                            | 0.428                          |

|                    |          |   |                  |       |      |       |       |
|--------------------|----------|---|------------------|-------|------|-------|-------|
| therapy            | Moderate | 5 | 0.95 (0.86-1.06) | 0.382 | 18.3 | 0.298 |       |
| Follow-up duration | ≥ 5.0    | 3 | 0.96 (0.88-1.06) | 0.437 | 0.0  | 0.552 | 0.583 |
| (years)            | <5.0     | 3 | 1.20 (0.65-2.21) | 0.568 | 50.5 | 0.133 |       |

---
