# Supplementary material
Source: publisher figshare collection journal article supplement (https://karger.figshare.com/articles/dataset/_/13153316)
Supplement: Supplementary file 2 [file 1]

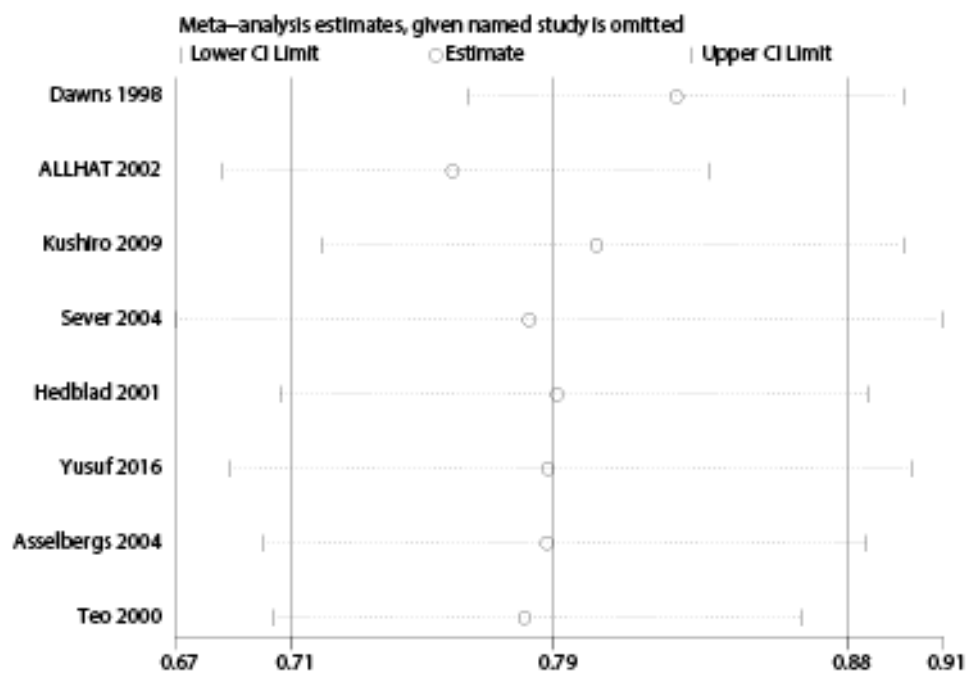

Figure S1. Sensitivity analysis for MACEs

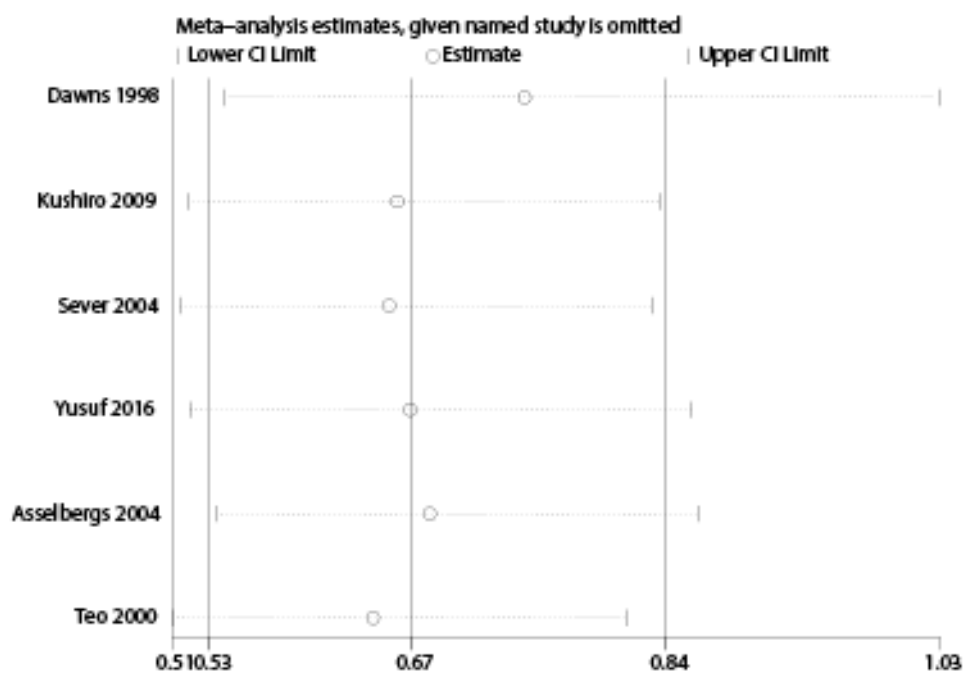

Figure S2. Sensitivity analysis for MI

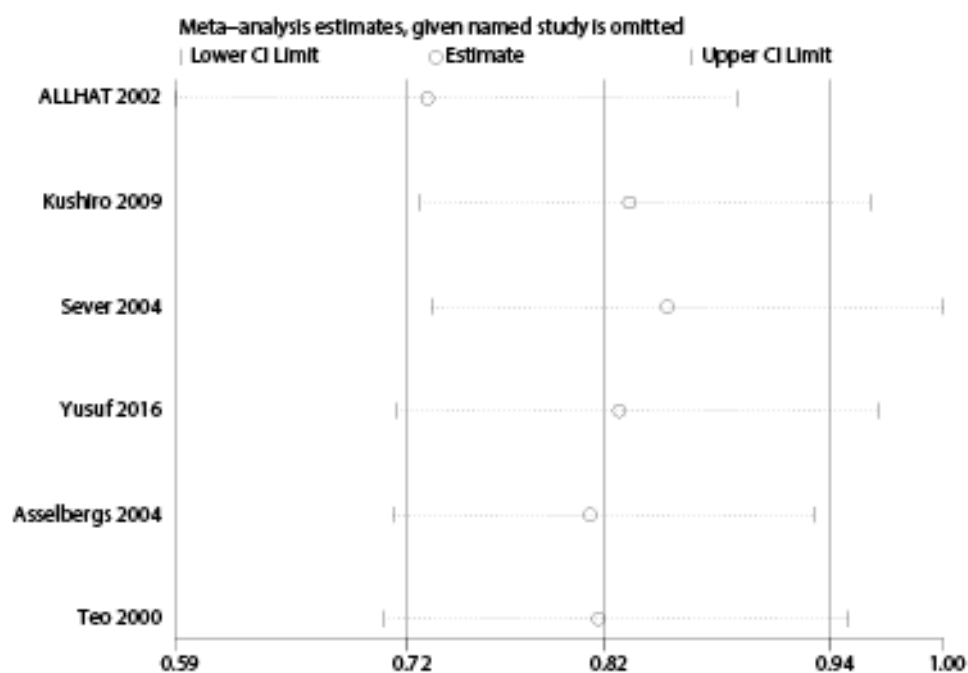

Figure S3. Sensitivity analysis for stroke

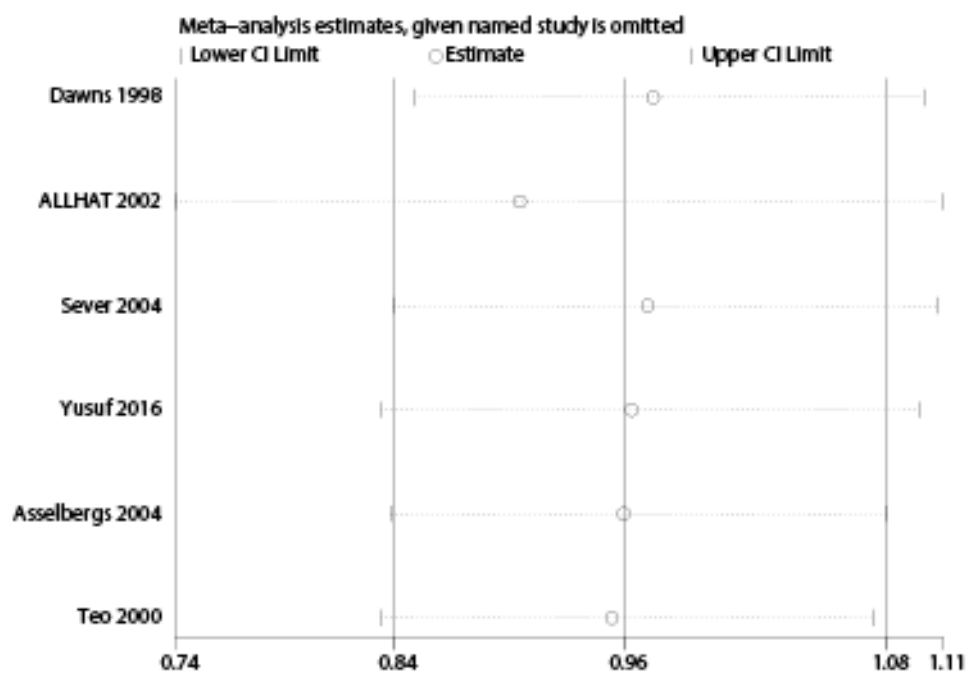

Figure S4. Sensitivity analysis for cardiac death

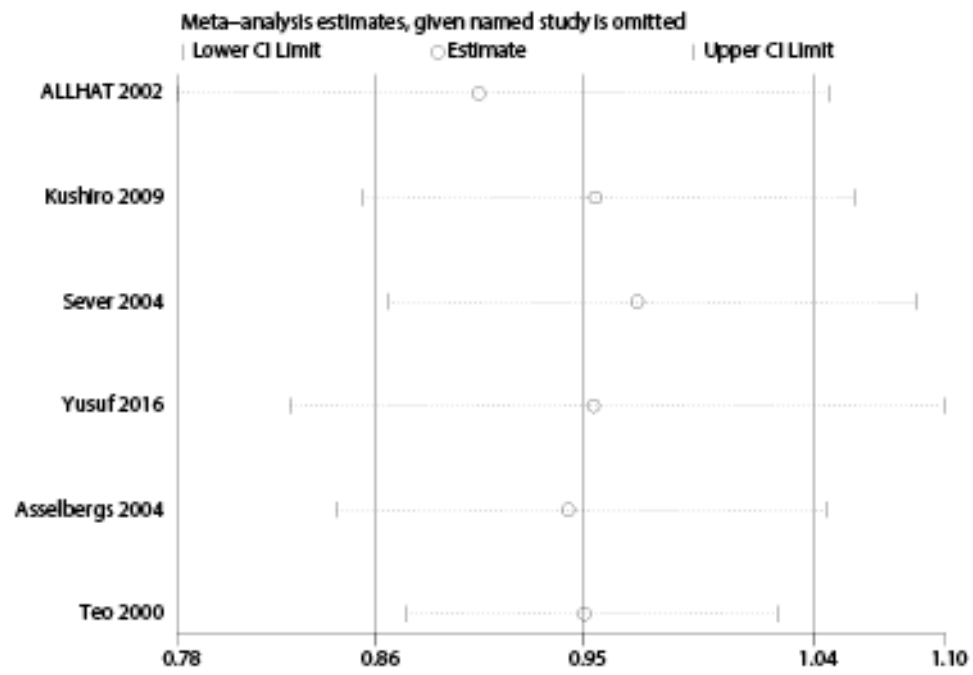

Figure S5. Sensitivity analysis for all-cause mortality
