# Supplementary material
Source: publisher figshare collection journal article supplement (https://karger.figshare.com/articles/dataset/_/13153316)
Supplement: Supplementary file 3 [file 1]

## **Supplemental 1. Search strategy used in PubMed**

#1 "hypertension"[MeSH Terms] OR "hypertension"[Title/Abstract] OR "high blood pressure"[Title/Abstract] OR "hypertensive"[Title/Abstract] OR "high blood pressures"[Title/Abstract]

#2 "Lovastatin"[Mesh] OR "Mevinolin"[Title/Abstract] OR "Monacolin"[Title/Abstract] OR "6-Methylcompactin"[Title/Abstract] OR "6 Methylcompactin"[Title/Abstract] OR "MK-803"[Title/Abstract] OR "MK 803"[Title/Abstract] OR "MK803"[Title/Abstract] OR "Mevacor"[Title/Abstract] OR "Lovastatin"[Title/Abstract]

#3 "Simvastatin"[Mesh] OR "Synvinolin"[Title/Abstract] OR "MK-733"[Title/Abstract] OR "MK 733"[Title/Abstract] OR "MK733"[Title/Abstract] OR "Zocor"[Title/Abstract] OR "Simvastatin"[Title/Abstract]

#4 "Pravastatin"[Mesh] OR "Eptastatin"[Title/Abstract] OR "Vasten"[Title/Abstract] OR "CS-514"[Title/Abstract] OR "CS 514"[Title/Abstract] OR "CS514"[Title/Abstract] OR "Lipemol"[Title/Abstract] OR "Liplat"[Title/Abstract] OR "Prareduct"[Title/Abstract] OR "Mevalotin"[Title/Abstract] OR "Pravachol"[Title/Abstract] OR "Elisor"[Title/Abstract] OR "Selektine"[Title/Abstract] OR "Lipostat"[Title/Abstract] OR "Pravacol"[Title/Abstract] OR "Pravasin"[Title/Abstract] OR "Pravastatin"[Title/Abstract] OR "RMS-431"[Title/Abstract] OR "RMS 431"[Title/Abstract] OR "RMS431"[Title/Abstract] OR "SQ-31000"[Title/Abstract] OR "SQ 31000"[Title/Abstract] OR "SQ31000"[Title/Abstract] OR

"SQ-31,000"[Title/Abstract] OR "SQ 31,000"[Title/Abstract] OR

"SQ31,000"[Title/Abstract] OR "Bristacol"[Title/Abstract]

#5 "fluvastatin" [Supplementary Concept] OR "fluindostatin"[Title/Abstract] OR

"Lescol"[Title/Abstract] OR "XU 62-320"[Title/Abstract] OR

"XU-62320"[Title/Abstract] OR "XU 62320"[Title/Abstract]

#6 "Atorvastatin Calcium"[Mesh] OR "Atorvastatin"[Title/Abstract] OR "CI

981"[Title/Abstract] OR "CI-981"[Title/Abstract] OR "CI981"[Title/Abstract] OR

"Lipitor"[Title/Abstract] OR "Liptonorm"[Title/Abstract]

#7 "Rosuvastatin Calcium"[Mesh] OR "Crestor"[Title/Abstract] OR

"Rosuvastatin"[Title/Abstract] OR "ZD4522"[Title/Abstract] OR "ZD

4522"[Title/Abstract]

#8 "pitavastatin" [Supplementary Concept] OR "itavastatin"[Title/Abstract] OR

"nisvastatin"[Title/Abstract] OR "P 872441"[Title/Abstract] OR

"P-872441"[Title/Abstract] OR "pitavastatin"[Title/Abstract] OR

"alipza"[Title/Abstract] OR "livalo"[Title/Abstract] OR "livazo"[Title/Abstract] OR

"nisvastatin"[Title/Abstract] OR "nk 104"[Title/Abstract] OR "nk104"[Title/Abstract]

OR "nks 104"[Title/Abstract] OR "nks104"[Title/Abstract] OR "pitava"[Title/Abstract]

OR "ribar"[Title/Abstract] OR "vezepira"[Title/Abstract]

#9 "lipid lowering drugs"[Title/Abstract] OR "lipid lowering agents"[Title/Abstract]

OR "Lipid-lowering medicine"[Title/Abstract] OR Statin\*[Title/Abstract] OR "lipid

lowering drug"[Title/Abstract] OR "lipid lowering agent"[Title/Abstract] OR

"Lipid-lowering medicines"[Title/Abstract]

#10 OR/2-9

#11 "Antihypertensive Agents"[Mesh] OR "Antihypertensives"[Title/Abstract] OR  
"Anti-Hypertensives"[Title/Abstract] OR "Anti Hypertensives"[Title/Abstract] OR  
"Antihypertensive"[Title/Abstract] OR "Anti-Hypertensive"[Title/Abstract] OR "Anti  
Hypertensive"[Title/Abstract]

#12 "Calcium Channel Blockers"[Mesh] OR "Calcium Channel Blockers"  
[Pharmacological Action] OR "Calcium Channel Antagonist"[Title/Abstract] OR  
"Exogenous Calcium Inhibitor"[Title/Abstract] OR "Exogenous Calcium  
Antagonist"[Title/Abstract] OR "Exogenous Calcium Blockader"[Title/Abstract] OR  
"Calcium Antagonist"[Title/Abstract]

#13 "Nifedipine"[Mesh] OR "Bay-1040"[Title/Abstract] OR "Bay  
1040"[Title/Abstract] OR "Bay1040"[Title/Abstract] OR  
"BAY-a-1040"[Title/Abstract] OR "BAY a 1040"[Title/Abstract] OR  
"BAYa1040"[Title/Abstract] OR "Cordipin"[Title/Abstract] OR  
"Cordipine"[Title/Abstract] OR "Corinfar"[Title/Abstract] OR  
"Korinfar"[Title/Abstract] OR "Nifangin"[Title/Abstract] OR  
"Procardia"[Title/Abstract] OR "Vascard"[Title/Abstract] OR  
"Nifedipine"[Title/Abstract] OR "Adalat"[Title/Abstract] OR  
"Fenigidin"[Title/Abstract]

#14 "Amlodipine"[Mesh] OR "Amlodis"[Title/Abstract] OR "Astudal"[Title/Abstract]  
OR "Norvasc"[Title/Abstract] OR "Istin"[Title/Abstract] OR "Amlor"[Title/Abstract]  
OR "Amlodipine"[Title/Abstract]

#15 "levamlodipine" [Supplementary Concept] OR "levamlodipine"[Title/Abstract]

#16 "Felodipine"[Mesh] OR "Felo Biochemie"[Title/Abstract] OR

"Felo-Puren"[Title/Abstract] OR "Felo Puren"[Title/Abstract] OR

"Felobeta"[Title/Abstract] OR "Felocor"[Title/Abstract] OR

"Felodipin"[Title/Abstract] OR "Felodipine"[Title/Abstract] OR

"Felodur"[Title/Abstract] OR "Felogamma"[Title/Abstract] OR

"Fensel"[Title/Abstract] OR "H 154-82"[Title/Abstract] OR "H 154 82"[Title/Abstract]

OR "H 15482"[Title/Abstract] OR "Perfudal"[Title/Abstract] OR

"Plendil"[Title/Abstract] OR "Flodil"[Title/Abstract] OR "Modip"[Title/Abstract] OR

"Renedil"[Title/Abstract] OR "Munobal"[Title/Abstract] OR "Agon"[Title/Abstract]

#17 "lacidipine" [Supplementary Concept] OR "Lacipil"[Title/Abstract] OR

"Lacimen"[Title/Abstract] OR "Caldine"[Title/Abstract] OR "Motens"[Title/Abstract]

OR "Lacidipine"[Title/Abstract] OR "GR 43659X"[Title/Abstract] OR

"GR-43659X"[Title/Abstract]

#18 "Nicardipine"[Mesh] OR "Cardene"[Title/Abstract] OR

"Vasonase"[Title/Abstract] OR "Antagonil"[Title/Abstract] OR

"Dagan"[Title/Abstract] OR "Flusemide"[Title/Abstract] OR "Lecibral"[Title/Abstract]

OR "Lincil"[Title/Abstract] OR "Loxen"[Title/Abstract] OR "Lucenfal"[Title/Abstract]

OR "Nicardipine"[Title/Abstract] OR "Nicardipino"[Title/Abstract] OR

"Perdipine"[Title/Abstract] OR "Ridene"[Title/Abstract] OR "Y-93"[Title/Abstract]

OR "Y 93"[Title/Abstract] OR "Y93"[Title/Abstract]

#19 "Nitrendipine"[Mesh] OR "Nitregamma"[Title/Abstract] OR "Nitrend

KSK"[Title/Abstract] OR "Nitrendepat"[Title/Abstract] OR "Nitren  
 acis"[Title/Abstract] OR "Nitrendi Biochemie"[Title/Abstract] OR  
 "Nitrendidoc"[Title/Abstract] OR "Nitrendimerck"[Title/Abstract] OR  
 "Nitrendipin"[Title/Abstract] OR "nitrendipincorax"[Title/Abstract] OR  
 "Nitrendipino"[Title/Abstract] OR "Nitrensal"[Title/Abstract] OR  
 "Nitrepress"[Title/Abstract] OR "Tensogradal"[Title/Abstract] OR  
 "Trendinol"[Title/Abstract] OR "Vastensium"[Title/Abstract] OR  
 "Balminil"[Title/Abstract] OR "Bay e 5009"[Title/Abstract] OR  
 "Baypresol"[Title/Abstract] OR "Baypress"[Title/Abstract] OR  
 "Bayotensin"[Title/Abstract] OR "Gericin"[Title/Abstract] OR  
 "Jutapress"[Title/Abstract] OR "Nidrel"[Title/Abstract] OR "Niprina"[Title/Abstract]  
 OR "Nitre AbZ"[Title/Abstract] OR "Nitre-Puren"[Title/Abstract] OR "Nitre  
 Puren"[Title/Abstract] OR "NitrePuren"[Title/Abstract] OR "Nitren 1A  
 Pharma"[Title/Abstract] OR "Nitren Lich"[Title/Abstract]  
 #20 "cilnidipine" [Supplementary Concept] OR "FRC 8653"[Title/Abstract] OR  
 "FRC-8653"[Title/Abstract] OR "cilnidipine"[Title/Abstract]  
 #21 "manidipine" [Supplementary Concept]  
 #22 "CV 4093"[Title/Abstract] OR "CV-4093"[Title/Abstract] OR  
 "manidipine"[Title/Abstract] OR "Perdipine"[Title/Abstract]  
 #23 "benidipine" [Supplementary Concept] OR "benidipine"[Title/Abstract]  
 #24 "lercanidipine" [Supplementary Concept] OR "Zanidip"[Title/Abstract] OR  
 "Lerdip"[Title/Abstract] OR "REC 15-2375"[Title/Abstract] OR

"REC-15-2375"[Title/Abstract] OR "Lercadip"[Title/Abstract] OR

"lercanidipine"[Title/Abstract]

#25 "Verapamil"[Mesh] OR "Iproveratril"[Title/Abstract] OR

"Cordilox"[Title/Abstract] OR "Dexverapamil"[Title/Abstract] OR

"Verapamil"[Title/Abstract] OR "Finoptin"[Title/Abstract] OR

"Izoptin"[Title/Abstract] OR "Isoptine"[Title/Abstract] OR "Lekoptin"[Title/Abstract]

OR "Calan"[Title/Abstract] OR "Falicard"[Title/Abstract]

#26 "Diltiazem"[Mesh] OR "Cardil"[Title/Abstract] OR "Cardizem"[Title/Abstract]

OR "CRD-401"[Title/Abstract] OR "CRD 401"[Title/Abstract] OR

"CRD401"[Title/Abstract] OR "Tiazac"[Title/Abstract] OR "Dilren"[Title/Abstract]

OR "Dilzem"[Title/Abstract] OR "Aldizem"[Title/Abstract] OR

"Dilacor"[Title/Abstract] OR "Diltiazem"[Title/Abstract]

#27 OR/11-26

#28 "Angiotensin-Converting Enzyme Inhibitors"[Mesh] OR

"Angiotensin-Converting Enzyme Inhibitors" [Pharmacological Action] OR

"Angiotensin Converting Enzyme Inhibitor"[Title/Abstract] OR "Kininase II

Antagonists"[Title/Abstract] OR "Kininase II Inhibitors"[Title/Abstract] OR

"Angiotensin I-Converting Enzyme Inhibitor"[Title/Abstract] OR "Angiotensin I

Converting Enzyme Inhibitor"[Title/Abstract] OR "ACE Inhibitors"[Title/Abstract]

OR "Angiotensin-Converting Enzyme Antagonist"[Title/Abstract] OR "Angiotensin

Converting Enzyme Antagonist"[Title/Abstract] OR "ACEI"[Title/Abstract]

#29 "Captopril"[Mesh] OR "Tensiomin"[Title/Abstract] OR "Lopirin"[Title/Abstract]

OR "SQ-14,534"[Title/Abstract] OR "SQ 14,534"[Title/Abstract] OR  
"SQ14,534"[Title/Abstract] OR "SQ-14534"[Title/Abstract] OR "SQ  
14534"[Title/Abstract] OR "SQ14534"[Title/Abstract] OR "Capoten"[Title/Abstract]  
OR "SQ-14,225"[Title/Abstract] OR "SQ 14,225"[Title/Abstract] OR "  
SQ14,225"[Title/Abstract] OR "SQ-14225"[Title/Abstract] OR "SQ  
14225"[Title/Abstract] OR "SQ14225"[Title/Abstract] OR "Captopril"[Title/Abstract]  
#30 "Enalapril"[Mesh] OR "MK-421"[Title/Abstract] OR "MK 421"[Title/Abstract]  
OR "MK421"[Title/Abstract] OR "Renitec"[Title/Abstract] OR  
"Renitek"[Title/Abstract] OR "Enalapril"[Title/Abstract]  
#31 "benazepril" [Supplementary Concept] OR "benazapril"[Title/Abstract] OR  
"benzazepril"[Title/Abstract] OR "Labopal"[Title/Abstract] OR  
"Lotensin"[Title/Abstract] OR "Cibacène"[Title/Abstract] OR  
"Cibacen"[Title/Abstract] OR "Briem"[Title/Abstract] OR  
"CGS-14824-A"[Title/Abstract] OR "CGS-14824A"[Title/Abstract]  
#32 "imidapril"[Supplementary Concept] OR "Tanatril"[Title/Abstract] OR "TA  
6366"[Title/Abstract] OR "TA-6366"[Title/Abstract] OR "imidapri"[Title/Abstract]  
#33 "lisinopril"[Title/Abstract] OR "Acerbon"[Title/Abstract] OR  
"Carace"[Title/Abstract] OR "Liprene"[Title/Abstract] OR "Prinivil"[Title/Abstract]  
OR "Prinizil"[Title/Abstract] OR "Tersil"[Title/Abstract]  
#34 "Perindopril"[Mesh] OR "Pirindopril"[Title/Abstract] OR  
"S-9490"[Title/Abstract] OR "S 9490"[Title/Abstract] OR "S9490"[Title/Abstract]  
OR "S 9490-3"[Title/Abstract] OR "S 9490 3"[Title/Abstract] OR "S

94903"[Title/Abstract] OR "Perindopril"[Title/Abstract] OR

"Perstarium"[Title/Abstract]

#35 "Ramipril"[Mesh] OR "Vesdil"[Title/Abstract] OR "Triatec"[Title/Abstract] OR

"Altace"[Title/Abstract] OR "Zabien"[Title/Abstract] OR "Ramace"[Title/Abstract]

OR "Tritace"[Title/Abstract] OR "Acovil"[Title/Abstract] OR "Delix"[Title/Abstract]

OR "Carasel"[Title/Abstract] OR "HOE-498"[Title/Abstract] OR "HOE

498"[Title/Abstract] OR "HOE498"[Title/Abstract] OR "Ramipril"[Title/Abstract]

#36 "trandolapril" [Supplementary Concept] OR "trandolapril"[Title/Abstract] OR

"Udrik"[Title/Abstract] OR "RU 44570"[Title/Abstract] OR

"RU44570"[Title/Abstract] OR "RU-44570"[Title/Abstract] OR

"Mavik"[Title/Abstract] OR "Gopten"[Title/Abstract]

#37 "Cilazapril"[Mesh] OR "Inhibace"[Title/Abstract] OR "Ro

31-2848"[Title/Abstract] OR "Ro 31 2848"[Title/Abstract] OR "Ro

312848"[Title/Abstract] OR "Ro-31-2848"[Title/Abstract] OR

"Ro312848"[Title/Abstract] OR "Cilazapril"[Title/Abstract]

#38 "Fosinopril"[Mesh] OR "Fosinil"[Title/Abstract] OR "Fositens"[Title/Abstract]

OR "Tenso Stop"[Title/Abstract] OR "Tensocardil"[Title/Abstract] OR

"Fozitec"[Title/Abstract] OR "Hiperlex"[Title/Abstract] OR

"Monopril"[Title/Abstract] OR "Fosinorm"[Title/Abstract] OR

"Newace"[Title/Abstract] OR "Staril"[Title/Abstract] OR "SQ-28,555"[Title/Abstract]

OR "SQ 28,555"[Title/Abstract] OR "SQ28,555"[Title/Abstract] OR

"SQ-28555"[Title/Abstract] OR "SQ 28555"[Title/Abstract] OR



"SQ28555"[Title/Abstract] OR "Dynacil"[Title/Abstract]

#39 OR/28-38

#40 "Angiotensin Receptor Antagonists"[Mesh] OR "Angiotensin Receptor Antagonists" [Pharmacological Action] OR "Angiotensin II Type 1 Receptor Blockers"[Mesh] OR "Angiotensin II Type 2 Receptor Blockers"[Mesh] OR "Angiotensin Receptor Blocker"[Title/Abstract] OR "Angiotensin Receptor Antagonist"[Title/Abstract] OR "Angiotensin II Receptor Antagonist"[Title/Abstract] OR "Angiotensin II Receptor Blocker"[Title/Abstract]

#41 "Losartan"[Mesh] OR "DuP-753"[Title/Abstract] OR "DuP 753"[Title/Abstract] OR "DuP753"[Title/Abstract] OR "MK-954"[Title/Abstract] OR "MK 954"[Title/Abstract] OR "MK954"[Title/Abstract] OR "Cozaar"[Title/Abstract] OR "Losartan"[Title/Abstract]

#42 "Valsartan"[Mesh] OR "Diovan"[Title/Abstract] OR "Kalpress"[Title/Abstract] OR "Tareg"[Title/Abstract] OR "Nisis"[Title/Abstract] OR "Provas"[Title/Abstract] OR "Vals"[Title/Abstract] OR "CGP 48933"[Title/Abstract] OR "48933, CGP"[Title/Abstract] OR "Miten"[Title/Abstract] OR "Valsartan"[Title/Abstract]

#43 "irbesartan" [Supplementary Concept] OR "SR 47436"[Title/Abstract] OR "SR-47436"[Title/Abstract] OR "BMS 186295"[Title/Abstract] OR "BMS-186295"[Title/Abstract] OR "Avapro"[Title/Abstract] OR "Karvea"[Title/Abstract] OR "Aprovel"[Title/Abstract] OR "irbesartan"[Title/Abstract]

#44 "telmisartan" [Supplementary Concept] OR "Pritor"[Title/Abstract] OR "BIBR 277"[Title/Abstract] OR "BIBR-277"[Title/Abstract] OR "Micardis"[Title/Abstract] OR "telmisartan"[Title/Abstract]

#45 "candesartan" [Supplementary Concept] OR "CV 11974"[Title/Abstract] OR "CV11974"[Title/Abstract] OR "CV-11974"[Title/Abstract] OR "candesartan"[Title/Abstract]

#46 "olmesartan" [Supplementary Concept] OR "Olmesartan Medoxomil"[Mesh] OR "Olmesartan"[Title/Abstract] OR "Benicar"[Title/Abstract] OR "Olmetec"[Title/Abstract] OR "CS 866"[Title/Abstract] OR "CS-866"[Title/Abstract] OR "Votum"[Title/Abstract] OR "omesartan"[Title/Abstract] OR "RNH 6270"[Title/Abstract] OR "CS-088"[Title/Abstract]

#47 "eprosartan" [Supplementary Concept] OR "Teveten"[Title/Abstract] OR "SK and F 108566"[Title/Abstract] OR "SKF-108566"[Title/Abstract] OR "eprosartan"[Title/Abstract]

#48 "allisartan isoproxil" [Supplementary Concept] OR "allisartan"[Title/Abstract] OR "ALS-3 compound"[Title/Abstract]

#49 "azilsartan" [Supplementary Concept] OR "azilsartan medoxomil" [Supplementary Concept] OR "TAK-536"[Title/Abstract] OR "TAK 491"[Title/Abstract] OR "TAK491"[Title/Abstract] OR "TAK-491"[Title/Abstract] OR "azilsartan"[Title/Abstract]

#50 OR/40-49

#51 "Diuretics"[Mesh] OR "Diuretics" [Pharmacological Action] OR

"Diuretics"[Title/Abstract]

#52 "Hydrochlorothiazide"[Mesh] OR "HCTZ"[Title/Abstract] OR

"Dichlothiazide"[Title/Abstract] OR "Dihydrochlorothiazide"[Title/Abstract] OR

"HydroDIURIL"[Title/Abstract] OR "Oretic"[Title/Abstract] OR

"Sectrazide"[Title/Abstract] OR "Esidrix"[Title/Abstract] OR "Esidrex"[Title/Abstract]

OR "Hypothiazide"[Title/Abstract]

#53 "Bendroflumethiazide"[Mesh] OR "Bendrofluazide"[Title/Abstract] OR

"Benzide"[Title/Abstract] OR "Berkozide"[Title/Abstract] OR "Urizid"[Title/Abstract]

OR "Esberizid"[Title/Abstract] OR "Naturetin"[Title/Abstract] OR

"Neo-NaClex"[Title/Abstract] OR "Neo NaClex"[Title/Abstract] OR

"NeoNaClex"[Title/Abstract] OR "Aprinox"[Title/Abstract] OR

"Centyl"[Title/Abstract] OR "Pluryl"[Title/Abstract] OR "Naturine"[Title/Abstract]

#54 "Indapamide"[Mesh] OR "Metindamide"[Title/Abstract] OR

"S-1520"[Title/Abstract] OR "S 1520"[Title/Abstract] OR "S1520"[Title/Abstract]

OR "SE-1520"[Title/Abstract] OR "SE 1520"[Title/Abstract] OR

"SE1520"[Title/Abstract] OR "Indapamide"[Title/Abstract]

#55 "Chlorthalidone"[Mesh] OR "Chlorphthalidolone"[Title/Abstract] OR

"Phthalamudine"[Title/Abstract] OR "Oxodoline"[Title/Abstract] OR

"Chlortalidone"[Title/Abstract] OR "Hygroton"[Title/Abstract] OR

"Thalitone"[Title/Abstract]

#56 "Furosemide"[Mesh] OR "Frusemide"[Title/Abstract] OR

"Fursemide"[Title/Abstract] OR "Frusemid"[Title/Abstract] OR

"Fusid"[Title/Abstract] OR "Lasix"[Title/Abstract] OR "Furosemide"[Title/Abstract]  
OR "Errolon"[Title/Abstract] OR "Furanthril"[Title/Abstract] OR  
"Furantral"[Title/Abstract]  
#57 "torsemide" [Supplementary Concept] OR "torasemide"[Title/Abstract] OR  
"Demadex"[Title/Abstract]  
#58 "Amiloride"[Mesh] OR "Amiduret Trom"[Title/Abstract] OR  
"Amiloberag"[Title/Abstract] OR "Midoride"[Title/Abstract] OR  
"Kaluril"[Title/Abstract] OR "Midamor"[Title/Abstract] OR  
"Modamide"[Title/Abstract] OR "Amidal"[Title/Abstract]  
#59 "Triamterene"[Mesh] OR "Urocaudal"[Title/Abstract] OR  
"Dyrenium"[Title/Abstract] OR "Dytac"[Title/Abstract]  
#60 "Spironolactone"[Mesh] OR "Spirolactone"[Title/Abstract] OR  
"Veroshpiron"[Title/Abstract] OR "Verospirone"[Title/Abstract] OR  
"Spiractin"[Title/Abstract] OR "Spironolactone"[Title/Abstract] OR  
"Spirobeta"[Title/Abstract] OR "Spirogamma"[Title/Abstract] OR  
"Spirolang"[Title/Abstract] OR "Spiro-no-Isis"[Title/Abstract] OR "Spiro-no  
Isis"[Title/Abstract] OR "Spironone"[Title/Abstract] OR "Spirospare"[Title/Abstract]  
OR "Verospiron"[Title/Abstract] OR "Aldactone"[Title/Abstract] OR "Aldactone  
A"[Title/Abstract] OR "Aquareduct"[Title/Abstract] OR "duraspiron"[Title/Abstract]  
OR "Flumach"[Title/Abstract] OR "Frumikal"[Title/Abstract] OR  
"Jenaspiron"[Title/Abstract] OR "Novo-Spiroton"[Title/Abstract] OR "Novo  
Spiroton"[Title/Abstract] OR "NovoSpiroton"[Title/Abstract] OR

"Practon"[Title/Abstract] OR "SC-9420"[Title/Abstract] OR "SC 9420"[Title/Abstract]

OR "SC9420"[Title/Abstract] OR "Spiro L.U.T. "[Title/Abstract]

#61 "eplerenone" [Supplementary Concept] OR "eplerenone"[Title/Abstract] OR

"eplerenon"[Title/Abstract] OR "Inspra"[Title/Abstract]

#62 OR/51-61

#63 "Adrenergic beta-Antagonists"[Mesh] OR "Adrenergic beta-Antagonists"

[Pharmacological Action] OR "Adrenergic beta Antagonists"[Title/Abstract] OR

"beta-Adrenergic Receptor Blockaders"[Title/Abstract] OR "beta Adrenergic Receptor

Blockaders"[Title/Abstract] OR "beta-Adrenergic Blockers"[Title/Abstract] OR "beta

Adrenergic Blockers"[Title/Abstract] OR "Adrenergic beta-Blockers"[Title/Abstract]

OR "Adrenergic beta-Receptor Blockaders"[Title/Abstract] OR "Adrenergic beta

Receptor Blockaders"[Title/Abstract] OR "beta-Adrenergic Blocking

Agents"[Title/Abstract] OR "beta Adrenergic Blocking Agents"[Title/Abstract]

#64 "Propranolol"[Mesh] OR "Propanolol"[Title/Abstract] OR

"Inderal"[Title/Abstract] OR "Avlocardyl"[Title/Abstract] OR

"AY-20694"[Title/Abstract] OR "AY 20694"[Title/Abstract] OR

"AY20694"[Title/Abstract] OR "Rexigen"[Title/Abstract] OR

"Dexpropranolol"[Title/Abstract] OR "Dociton"[Title/Abstract] OR

"Obsidan"[Title/Abstract] OR "Obzidan"[Title/Abstract] OR

"Anaprilin"[Title/Abstract] OR "Anapriline"[Title/Abstract] OR

"Betadren"[Title/Abstract]

#65 "Atenolol"[Mesh] OR "Tenormine"[Title/Abstract] OR "Tenormin"[Title/Abstract]

OR "ICI-66082"[Title/Abstract] OR "ICI 66082"[Title/Abstract] OR  
"ICI66082"[Title/Abstract] OR " Atenolol "[Title/Abstract]  
#66 "Metoprolol"[Mesh] OR "Betalok"[Title/Abstract] OR  
"CGP-2175"[Title/Abstract] OR "CGP 2175"[Title/Abstract] OR  
"CGP2175"[Title/Abstract] OR "H 93-26"[Title/Abstract] OR "H 93  
26"[Title/Abstract] OR "H 9326"[Title/Abstract] OR "pressor"[Title/Abstract] OR  
"Beloc-Duriles"[Title/Abstract] OR "Beloc Duriles"[Title/Abstract] OR  
"BelocDuriles"[Title/Abstract] OR "Seloken"[Title/Abstract] OR  
"Spesicor"[Title/Abstract] OR "Spesikor"[Title/Abstract] OR  
"Metoprolol"[Title/Abstract] OR "Toprol-XL"[Title/Abstract] OR "Toprol  
XL"[Title/Abstract] OR "ToprolXL"[Title/Abstract] OR "Toprol"[Title/Abstract] OR  
"Betaloc"[Title/Abstract]  
#67 "Bisoprolol"[Mesh] OR "CL-297939"[Title/Abstract] OR "CL  
297939"[Title/Abstract] OR "CL297939"[Title/Abstract] OR "Concor"[Title/Abstract]  
OR "EMD-33512"[Title/Abstract] OR "EMD 33512"[Title/Abstract] OR  
"EMD33512"[Title/Abstract] OR "Bisoprolol"[Title/Abstract]  
#68 "Betaxolol"[Mesh] OR "Betaxolol"[Title/Abstract] OR "Kerlone"[Title/Abstract]  
OR "Oxodal"[Title/Abstract] OR "Kerlon"[Title/Abstract] OR  
"SL-75212"[Title/Abstract] OR "SL 75212"[Title/Abstract] OR  
"SL75212"[Title/Abstract] OR "ALO-1401-02"[Title/Abstract] OR "  
ALO 1401 02"[Title/Abstract] OR "ALO140102"[Title/Abstract] OR  
"Betoptic"[Title/Abstract] OR "Betoptima"[Title/Abstract]

#69 "Sotalol"[Mesh] OR "Sotalol"[Title/Abstract] OR "MJ-1999"[Title/Abstract] OR  
"MJ 1999"[Title/Abstract] OR "MJ1999"[Title/Abstract] OR "Darob"[Title/Abstract]

#70 "Nebivolol"[Mesh] OR "Bystolic"[Title/Abstract] OR "Nebilet"[Title/Abstract]  
OR "Silostar"[Title/Abstract] OR "Nebivolol"[Title/Abstract] OR "R  
67555"[Title/Abstract] OR "R-67555"[Title/Abstract] OR "R67555"[Title/Abstract]  
OR "Lobivon"[Title/Abstract]

#71 OR/63-70

#72 "Adrenergic alpha-Antagonists" [Pharmacological Action] OR "Adrenergic  
alpha-Antagonists"[Mesh] OR "Adrenergic alpha Antagonists"[Title/Abstract] OR  
"Adrenergic alpha-Receptor Blockaders"[Title/Abstract] OR "Adrenergic alpha  
Receptor Blockaders"[Title/Abstract] OR "alpha-Receptor Blockaders,  
Adrenergic"[Title/Abstract] OR "alpha-Adrenergic Blocking Agents"[Title/Abstract]  
OR "alpha Adrenergic Blocking Agents"[Title/Abstract] OR "alpha-Adrenergic  
Blockers"[Title/Abstract] OR "alpha Adrenergic Blockers"[Title/Abstract] OR  
"alpha-Adrenergic Receptor Blockaders"[Title/Abstract] OR "alpha Adrenergic  
Receptor Blockaders"[Title/Abstract] OR "Adrenergic alpha-Blockers"[Title/Abstract]  
OR "Adrenergic alpha Blockers"[Title/Abstract]

#73 "Doxazosin"[Mesh] OR "Uriduct"[Title/Abstract] OR "Alfamedin"[Title/Abstract]  
OR "Cardura"[Title/Abstract] OR "Zoxan"[Title/Abstract] OR  
"Carduran"[Title/Abstract] OR "Cardular"[Title/Abstract] OR  
"Diblocin"[Title/Abstract] OR "Doxa-Puren"[Title/Abstract] OR "Doxa  
Puren"[Title/Abstract] OR "Doxacor"[Title/Abstract] OR "DoxaUro"[Title/Abstract]

OR "Doxagamma"[Title/Abstract] OR "Doxamax"[Title/Abstract] OR

"Doxatensa"[Title/Abstract] OR "Doxazomerck"[Title/Abstract] OR

"Doxazosin"[Title/Abstract] OR "Jutalar"[Title/Abstract] OR "Progandol

Neo"[Title/Abstract] OR "UK-33274"[Title/Abstract] OR "UK 33274"[Title/Abstract]

OR "UK33274"[Title/Abstract]

#74 "Prazosin"[Mesh] OR "Furazosin"[Title/Abstract] OR "Prazosin"[Title/Abstract]

OR "Minipress"[Title/Abstract] OR "Pratsiol"[Title/Abstract]

#75 "Terazosin" [Supplementary Concept] OR "Adecurel"[Title/Abstract] OR

"Terazosin"[Title/Abstract] OR "Dysalfa"[Title/Abstract] OR "Hytrin"[Title/Abstract]

OR "Deflox"[Title/Abstract] OR "Heitrin"[Title/Abstract] OR "Flotrin"[Title/Abstract]

OR "Hytrine"[Title/Abstract] OR "Hytrin BPH"[Title/Abstract] OR

"Magnurol"[Title/Abstract] OR "Sutif"[Title/Abstract] OR "Tazusin"[Title/Abstract]

OR "Terazoflo"[Title/Abstract] OR "Zayasel"[Title/Abstract] OR "A

45975"[Title/Abstract]

#76 OR/72-75

#77 OR/27,39,50,62,71,76

#78 #10 AND #77

#79 "amlodipine, atorvastatin drug combination" [Supplementary Concept] OR

"amlodipine - atorvastatin"[Title/Abstract] OR "Caduet"[Title/Abstract]

#80 "Atorvastatin Calcium"[Mesh] OR "Atorvastatin"[Title/Abstract] OR "CI

981"[Title/Abstract] OR "CI-981"[Title/Abstract] OR "CI981"[Title/Abstract] OR

"Lipitor"[Title/Abstract] OR "Liptonorm"[Title/Abstract]



#81 "Amlodipine"[Mesh] OR "Amlodis"[Title/Abstract] OR "Astudal"[Title/Abstract]  
OR "Norvasc"[Title/Abstract] OR "Istin"[Title/Abstract] OR "Amlor"[Title/Abstract]  
OR "Amlodipine"[Title/Abstract]

#82 #80 AND #81

#83 #79 OR #82

#84 #78 OR #83

#85 #1 AND #84

#86 "Clinical Trials, Phase II as Topic"[Mesh] OR "Clinical Trials, Phase III as  
Topic"[Mesh] OR "Clinical Trials, Phase IV as Topic"[Mesh] OR "Controlled Clinical  
Trials as Topic"[Mesh] OR "Randomized Controlled Trials as Topic"[Mesh] OR  
"Intention to Treat Analysis"[Mesh] OR "Pragmatic Clinical Trials as Topic"[Mesh]  
OR "Clinical Trials, Phase II"[Publication Type] OR "Clinical Trials, Phase  
III"[Publication Type] OR "Clinical Trials, Phase IV"[Publication Type] OR  
"Controlled Clinical Trials"[Publication Type] OR "Randomized Controlled  
Trials"[Publication Type] OR "Pragmatic Clinical Trials as Topic"[Publication Type]  
OR "Single-Blind Method"[Mesh] OR "Double-Blind Method"[Mesh]

#87 random\*[Title/Abstract] OR blind\*[Title/Abstract] OR  
singleblind\*[Title/Abstract] OR doubleblind\*[Title/Abstract] OR  
trebleblind\*[Title/Abstract] OR tripleblind\*[Title/Abstract]

#88 #86 OR #87

#89 #85 AND #88
