# Supplementary material
Source: publisher figshare collection journal article supplement (https://karger.figshare.com/articles/dataset/_/13153316)
Supplement: Supplementary file 4 [file 1]

| Table S1. Additional characteristics of included studies |                         |            |            |                 |                                 |        |             |                                                                                                                                    |
|----------------------------------------------------------|-------------------------|------------|------------|-----------------|---------------------------------|--------|-------------|------------------------------------------------------------------------------------------------------------------------------------|
| Study ID                                                 | Number of men and women | SBP (mmHg) | DBP (mmHg) | CHD history (%) | BMI (kg/m²)                     | DM (%) | Smoking (%) | MACE definition                                                                                                                    |
| Dawns 1998 (AFCAPS/TextCAPS) [16]                        | 5608/997                | 138.0      | 78.0       | 15.7            | 27.1 for men and 26.4 for women | 2.3    | 12.4        | Fatal or nonfatal MI, UA, or sudden cardiac death                                                                                  |
| ALLHAT Collaborative Research Group 2002 [17]            | 5304/5051               | 145.0      | 84.0       | 14.2            | 29.9                            | 35.1   | 23.2        | Fatal CHD and nonfatal MI                                                                                                          |
| Kushiro 2009 (MEGA) [18]                                 | 996/2281                | 141.0      | 83.0       | NA              | 24.6                            | 20.0   | 15.0        | Coronary heart disease, coronary heart disease plus cerebral infarction, and cardiovascular disease                                |
| Sever 2003 (ASCOT-LLA) [19]                              | 8363/1942               | 164.2      | 95.0       | 3.8             | 28.6                            | 24.5   | 32.7        | Total coronary events, fatal CHD and nonfatal MI, fatal and nonfatal stroke, fatal and nonfatal heart failure, all-cause mortality |
| Hedblad 2001 (BCAPS) [20]                                | 175/221                 | 138.5      | 84.5       | 3.8             | 25.5                            | 3.0    | 32.6        | Fatal or nonfatal MI, nonfatal stroke, or sudden cardiac death                                                                     |
| Yusuf 2016 (HOPE-3) [21]                                 | 3446/2910               | 138.2      | 81.9       | 0.0             | 27.2                            | 6.1    | 28.0        | Death from cardiovascular causes, nonfatal MI, or nonfatal stroke                                                                  |
| Asselbergs 2004 (PREVEND IT) [22]                        | 561/303                 | 130.5      | 76.5       | 3.8             | 26.0                            | 2.6    | 40.0        | Nonfatal MI, and/or myocardial ischemia, heart failure, peripheral vascular disease,                                               |

|                         |        |    |    |      |    |      |      | cerebrovascular<br>accident, and cardiac<br>death           |
|-------------------------|--------|----|----|------|----|------|------|-------------------------------------------------------------|
| Teo 2000 (SCAT)<br>[23] | 410/50 | NA | NA | 70.0 | NA | 11.0 | 15.0 | Fatal or nonfatal MI,<br>stroke, and all-cause<br>mortality |

\*BMI: body mass index; DM: diabetes mellitus; MACE: major adverse cardiovascular events; MI: myocardial infarction; UA: unstable angina
