# Supplementary material
Source: publisher figshare collection journal article supplement (https://karger.figshare.com/articles/dataset/_/13153316)
Supplement: Supplementary file 5 [file 1]

**Table. Subgroup analysis for MACEs based on additional factors**

| Variable              | Group   | Number<br>of trials | RR and 95% CI    | P value | I-square (%) | P value for<br>heterogeneity | P value for<br>meta-regression |
|-----------------------|---------|---------------------|------------------|---------|--------------|------------------------------|--------------------------------|
| BMI                   | ≥ 28.0  | 2                   | 0.85 (0.75-0.97) | 0.013   | 47.6         | 0.167                        | 0.029                          |
|                       | < 28.0  | 5                   | 0.70 (0.61-0.81) | <0.001  | 0.0          | 0.698                        |                                |
| SBP                   | ≥ 140.0 | 3                   | 0.82 (0.71-0.95) | 0.006   | 50.8         | 0.131                        | 0.076                          |
|                       | <140.0  | 4                   | 0.71 (0.61-0.83) | <0.001  | 0.0          | 0.578                        |                                |
| DBP                   | ≥ 80.0  | 5                   | 0.82 (0.75-0.90) | <0.001  | 15.0         | 0.319                        | 0.052                          |
|                       | < 80.0  | 2                   | 0.65 (0.52-0.81) | <0.001  | 0.0          | 0.448                        |                                |
| Percentage of smoking | ≥ 20.0  | 5                   | 0.84 (0.77-0.91) | <0.001  | 0.0          | 0.593                        | 0.048                          |
|                       | < 20.0  | 3                   | 0.73 (0.53-0.99) | 0.042   | 55.5         | 0.106                        |                                |

|                           |        |   |                  |        |      |       |       |
|---------------------------|--------|---|------------------|--------|------|-------|-------|
| Percentage of DM          | ≥ 10.0 | 4 | 0.84 (0.73-0.97) | 0.017  | 46.7 | 0.131 | 0.058 |
|                           | < 10.0 | 4 | 0.71 (0.61-0.83) | <0.001 | 0.0  | 0.578 |       |
| Percentage of CHD history | ≥ 10.0 | 3 | 0.84 (0.61-1.14) | 0.258  | 77.0 | 0.013 | 0.323 |
|                           | < 10.0 | 4 | 0.79 (0.71-0.88) | <0.001 | 0.0  | 0.970 |       |
